# Supplementary material for: Study on the relationship between serum iodine and dysfunctions: a cross-sectional study
Source: Research Square preprint supplement (doi:10.21203/rs.3.rs-2023998/v1), 2022-09-06
Supplement: Supplementary file 1 [file df13427b4aa8f39a72ee0d99.pdf]

Table 1 Diagnostic criteria for thyroid dysfunctions

| Thyroid dysfunctions        | Diagnostic criteria                                             |
|-----------------------------|-----------------------------------------------------------------|
| Overt hyperthyroidism       | TSH<0.27 mIU/L, FT4>22 pmol/L or TSH<0.27 IU/ML, FT3>6.8 pmol/L |
| Subclinical hyperthyroidism | TSH<0.27 mIU/L, 12<FT4<22 pmol/L and 3.6<FT3<6.8 pmol/L         |
| Overt hypothyroidism        | TSH>4.2 mIU/L, FT4<12 pmol/L                                    |
| Subclinical hypothyroidism  | TSH>4.2 mIU/L, 12 pmol/L<FT4<22 pmol/L                          |
| TPOAb positive              | TPOAb>34 IU/ml                                                  |
| TgAb positive               | TgAb>115 IU/ml                                                  |

TSH: Thyroid stimulating hormone; FT4: free thyroxine; FT3: free triiodothyronine; TPOAb: thyroid peroxidase antibodies; TgAb: thyroglobulin antibodies.

Provided by the laboratory department of the General Hospital of Tianjin Medical University.
